# Supplementary material for: Genome-wide identification and analysis of the ZCN gene family in maize (Zea mays L.)
Source: Research Square preprint supplement (doi:10.21203/rs.3.rs-7400912/v1), 2025-10-17
Supplement: Supplementary file 1 [file 02cf8c73cbe462661b36bb1c.xlsx]

## Sheet: Ark1
Table S3 Homozygous mutation status of the ZCN gene
Gene name	Mutation type		sgRNA mutation results（single chain）
ZCN1	2 bp deletion		GGATCGTGACTGATA--CCT
	T＞C and 2 bp deletion		GGATCGTGACTGATACAC--
ZCN2	4 bp deletion		AACAGCAGGTTAC----ATC
	1 bp insertion		AACAGCAGGTTACTTCTAATC
	85 bp insertion		AACAGCAGGTTACTTCTT……TATC
ZCN3	2 bp deletion		GGATCGTGACTGATA--CCT
ZCN4	G＞A		AGTGATCCATACCTGAAAGA
	1 bp insertion		AGTAGATCCATACCTGAAGA
	1 bp insertion		AGTTGATCCATACCTGAAGA
ZCN5	1 bp insertion		AGTAGATCCATACCTGAGAGA
	1 bp insertion		AGTCGATCCATACCTGAGAGA
	56 bp insertion		AGTGAA……CTCCATACCTGAGAGA
ZCN6	1 bp deletion		GGATCGTGACTGATAT-CCT
ZCN9	10 bp deletion		GGTGGGG----------GCG
	3 bp deletion		GGTGGGGCGGGTGA---GCG
	1 bp insertion		GGTGGGGCGGGTGATCGAGCG
ZCN10	1 bp deletion		GGTGGGGCGGGTGATCG-CG
ZCN11	T＞G		GAGGGTGATCGGCGACGGGG
	1 bp deletion		GAGGGTGATCGGCGAC-TGG
ZCN12	7 bp deletion		AACAGCAGGTT-------TC
	13 bp insertion and 9 bp deletion		AACAGCAGA……A---------ATC
	4 bp deletion		AACAGCAGGTTACTTC----
ZCN13	4 bp deletion		TCGTGTCATAGGAGAT--CC
ZCN14	17 bp deletion		C-----------------CC
ZCN15	5 bp deletion		CGGCAGACGGTGTACGC-----
ZCN17	1 bp deletion		CAATATGTCTAGGGACC-AT
ZCN19	1 bp insertion		CAAAGTCCAAGTAACCCAACA
	1 bp deletion		CAAGTC-AAGTAACCCAACA
ZCN20	1 bp insertion		CGTGGACTACTTCTCGGTCGT
	198 bp deletion		-----------------CGT
ZCN21	1 bp insertion		GCCGGCGGCTAACGATTACCT
	1 bp insertion		GCCGGCGGCTAACGATTCCCT
	1 bp deletion		GCCGGCGGCTAACGAT-CCT
	-4 bp,-4 bp		GCCGGCGGCTAAC----CCT
ZCN24	C＞T		GTTGCTGCATTATATTTCAA
ZCN25	10 bp deletion		----------GTAACCCAACA
	1 bp insertion		CAAAGTCCAAGTAACCCAACA
	15 bp deletion		CAA---------------CA
