# Supplementary material for: Genome-wide identification and analysis of the ZCN gene family in maize (Zea mays L.)
Source: Research Square preprint supplement (doi:10.21203/rs.3.rs-7400912/v1), 2025-10-17
Supplement: Supplementary file 2 [file a8fa26e0ad0e1c4400c25ea4.xlsx]

## Sheet: Ark1
Table S1. Designed sgRNA and primers for ZCN gene family detection in maize
Gene name	Gene ID	sgRNA		site	Detect primer sequences(5’ to 3’)
ZCN1	Zm00001d044704	GGATCGTGACTGATATACCT		third exon	Z1F:CTACATCTCTGATGGCCATGC
					Z1R:CAGGTGGACAATAAGAGCTGG
ZCN2	Zm00001d050649	GGATCGTGACTGATATACCT		first exon	Z2F:CAGTACTGTGAGAGTAAGGC
					Z2R:CAGTGCAGATACTCCCTCAG
ZCN3	Zm00001d023419	GGATCGTGACTGATATACCT		third exon	Z3F:CCTGATGGCCATGGTCATC
					Z3R:GCTGGGATTTTCAGCGTCTC
ZCN4	Zm00001d023419	GGATCGTGACTGATATACCT		second exon	Z4F:CTTAGCTTACGACGACAGGT
					Z4R:ATATACGTGTGTGTGGCTGT
ZCN5	Zm00001d025346	GGATCGTGACTGATATACCT		second exon	Z5F:GCTCTTCAGTACTTCAGGCT
					Z5R:GAGTGCCTGACTCACTTTCC
ZCN6	Zm00001d052537	GGATCGTGACTGATATACCT		third exon	Z6F:TCCACACAGTTAGCTCTCCA
					Z6R:GTTGAAGTACACAGCGGCTA
ZCN7	Zm00001d038725	TCAACTGCAGAAGCTTTGCA		fourth exon	Z7F:TTCATGCTTGGTTTTACCTGAGA
					Z7R:AGAGGTGGTGCATTGACATT
ZCN8	Zm00001d010752	TCAACTGCAGAAGCTTTGCA		fourth exon	Z8F:TAATGTCAGGATGCTCTCGC
					Z8R:ACTGGGGCACAATACTTTGA
ZCN9	Zm00001d008446	GGTGGGGCGGGTGATCGGCG		first exon	Z9F:GTCGTGCCAATAGTCCAAGT
					Z9R:CTGCGGTATATACGTACCAGT
ZCN10	Zm00001d040113	GGTGGGGCGGGTGATCGGCG		first exon	Z10F:GCTTTGAAGCTAACGTGTCA
					Z10R:AGCAAGTTGTGCAATCCATC
ZCN11	Zm00001d037439	GAGGGTGATCGGCGACGTGG		first exon	Z11F:TCTCATCGTCCTTCCACTATCA
					Z11R:GATCGATCGGAATCAAGCACT
ZCN12	Zm00001d043461	AACAGCAGGTTACTTCTATC		first exon	Z12F:ACGACATGGCGCTAGTATCT
					Z12R:CCAGTGCAGATACTCCCTCA
ZCN13	Zm00001d016253	TCGTGTCATAGGAGATGTCC		first exon	Z13F:AAGTGGGTTCCCATGATTTG
					Z13R:GAAGCTATGCCTATAGGGCT
ZCN14	Zm00001d008939	CGGCAGACGGTGTACGCCCC		fourth exon	Z14F:GATGTGCCAACTCAAAGTCG
					Z14R:ATCACATTCTTCTCCCACCG
ZCN15	Zm00001d036242	CGGCAGACGGTGTACGCCCC		fourth exon	Z15F:CGGCAGACGGTGTACGCCCC
					Z15R:GATGGAGTGAGTAGTGTGCAT
ZCN16	Zm00001d017134	AGGCAAACTATTTATGCGCC		third exon	Z16F:AAGCAAACGAAATGCTCACG
					Z16R:GTGCTTGGCCTCATACAGAA
ZCN17	Zm00001d004630	CAATATGTCTAGGGACCCAT		first exon	Z17F:CAACTTCTTGCAATAGCCGC
					Z17R:AATGCGATGACAATCACACAC
ZCN18	Zm00001d006116	TTGAAGTATAATGCAGCAAC		fourth exon	Z18F:TTGAGGACAGCAGGTAGTGA
					Z18R:GCTAGAGGCACCACTCAAAA
ZCN19	Zm00001d025737	TTGAAGTATAATGCAGCAAC		first exon	Z19F:CGGAATAAAGACATGCGTGG
					Z19R:TGAACACTATTCTCATCTGCGG
ZCN20	Zm00001d024023	TGTTGGGTTACTTGGACTTG		first exon	Z20F:TAGACAACACAGTCGCACTC
					Z20R:AGTGAATAGCTGGTTGGCAG
ZCN21	Zm00001d004010	CGTGGACTACTTCTCGGCGT		first exon	Z21F:GACTACATACACACAGCCCA
					Z21R:CTTCTCCTCCGATCTCAACC
ZCN24	Zm00001d021135	TTGAAGTATAATGCAGCAAC		fourth exon	Z24F:CTTCTCCTCCGATCTCAACC
					Z24R:ATGCCCAATGAACCAACCAT
ZCN25	Zm00001d003226	TGTTGGGTTACTTGGACTTG		second exon	Z25F:AAGAATGCCTAGATTGCGCT
					Z25R:CAGGCTGCATAATCTGTGGT
ZCN26	Zm00001d046300	GACGAGGGGCCACATAATCG		first exon	Z26F:TCTCGTTAACATGCCTCAGC
					Z26R:GTAGTCAACCGAGCTATGGG
ZCNPEBP	Zm00001e027276	GCTGGTGTCGCACCCGATCG		first exon	ZPF:CGACGCTTGAGCTGTAGGTT
					ZPR:CTTCCAGTCGTTGACCCCCTC
