# Supplementary material for: Genome-wide identification and analysis of the ZCN gene family in maize (Zea mays L.)
Source: Research Square preprint supplement (doi:10.21203/rs.3.rs-7400912/v1), 2025-10-17
Supplement: Supplementary file 3 [file bb8bc6f00eed32d860e13b4e.xlsx]

## Sheet: Ark1
Table S2 Primers for amplifying ZCN gene family CDS sequences and constructing subcellular localization vectors
Gene name	CDS amplification primers(5’ to 3’)	eGFP homologous recombination primers(5’ to 3’)	Primer design for the NLS-removed subcellular localization vector(5’ to 3’)
ZCN1	Z1-cF:catgtctaggtctgtggagcc	Z1-cF-HA:TGCAGGTCGACTCTAGAGGATCCatgtctaggtctgtggagcc	Z17-nF:atgttcaatatgtctagggac
	Z1-cR:ttcaacgtctcctagctgcag	Z1-cR-HA:AGCTCCTCGCCCTTGCTCACCATacgtctcctagctgcagtttc	Z17-nR:tcagttctctctctggcagttga
ZCN2	Z2-cF:atgtcaagggtgttggagcct	Z2-cF-HA:TGCAGGTCGACTCTAGAGGATCCatgtcaagggtgttggagcc	Z20-nF:atgtccagggatccgcttgtg
	Z2-cR:cgtacgttgagccgtacggtt	Z2-cR-HA:GCTCCTCGCCCTTGCTCACCATgcgtcggcgggcggcggt	Z20-nR:ctccctctggcagttgaagtag
ZCN3	Z3-cF:atgtccaggtctgtggagcc	Z3-cF-HA:TGCAGGTCGACTCTAGAGGATCCatgtccaggtctgtggagcc	Z25-nF:atgtcaagggacccactagt
	Z3-cR:tcagcgtctcctagcagcag	Z3-cR-HA:AGCTCCTCGCCCTTGCTCACCATgcgtctcctagcagcagttt	Z25-nR:attctccctttgacaattgaag
ZCN4	Z4-cF:atgtctagagcgttggaacctc	Z4-cF-HA:AGGTCGACTCTAGAGGATCCatgtctagagcgttggaacc	Z17-nF-HA:ACTCACGGCATGGACGAGCTGTACatgttcaatatgtctagggac
	Z4-cR:gaggtagcggtgatgatcgatc	Z4-cR-HA:TCCTCGCCCTTGCTCACCATgcggcggcgcgcggcagtct	Z17-nR-HA:CGAGCTCGGTACCCGGGTTACTtcagttctctctctggcagttga
ZCN5	Z5-cF:catgtctagggcgttggagc	Z5-cF-HA:AGGTCGACTCTAGAGGATCCcatgtctagggcgttggagc	Z20-nF-HA:ACTCACGGCATGGACGAGCTGTACatgtccagggatccgcttgtg
	Z5-cR:tgcaggtgatcgctcagcgg	Z5-cR-HA:TCCTCGCCCTTGCTCACCATtgcaggtgatcgctcagcgg	Z20-nR-HA:AGCTCGGTACCCGGGTTACTtcactccctctggcagttgaagtag
ZCN6	Z6-cF:ccatgtctagatctgtggagtc	Z6-cF-HA:GTCGACTCTAGAGGATCCatgtctagatctgtggagtctc	Z25-nF-HA:ACTCACGGCATGGACGAGCTGTACatgtcaagggacccactagta
	Z6-cR:cggaattttcagcgcctcct	Z6-cR-HA:GCTCCTCGCCCTTGCTCACCATgcgcctcctagcagcagt	Z25-nR-HA:AGCTCGGTACCCGGGTTACTtcaattctccctttgacaattgaag
ZCN7	Z7-cF:atgctcaggctgcagctt	Z7-cF-HA:AGGTCGACTCTAGAGGATCCatgctcaggctgcagctt
	Z7-cR:ctctactcttccctaaaccttctt	Z7-cR-HA:TCCTCGCCCTTGCTCACCATctctactcttccctaaaccttctt
ZCN8	Z8-cF:atgtcagcaaccgatcatttgg	Z8-cF-HA:AGGTCGACTCTAGAGGATCCatgtcagcaaccgatcattt
	Z8-cR:tactcttccctaaaccttcttccg	Z8-cR-HA:TCCTCGCCCTTGCTCACCATctcttccctaaaccttcttc
ZCN9	Z9-cF:ctagcatggcgcgcttcg	Z9-cF-HA:GTCGACTCTAGAGGATCCatggcgcgcttcgtggatccgc
	Z9-cR:cagagaggagctgctagctag	Z9-cR-HA:TCCTCGCCCTTGCTCACCATgcggcggcggctggcggg
ZCN10	Z10-cF:gatcatggcgcggttcgt	Z10-cF-HA:ACTCTAGAGGATCCatggcgcggttcgtggacccgctggt
	Z10-cR:gctactagctagcggcggc	Z10-cR-HA:TCCTCGCCCTTGCTCACCATgcggcggcggtggttggccg
ZCN11	Z11-cF:gtgtccagagccgccatg	Z11-cF-HA:AGGTCGACTCTAGAGGATCCatggctgcccatgtggaccc
	Z11-cR:gacgatcagcctgtctcagt	Z11-cR-HA:TCCTCGCCCTTGCTCACCATgtagtggcggcggcgactag
ZCN12	Z12-cF:acaaaatgtctgatgtggagcc	Z12-cF-HA:GTCGACTCTAGAGGATCCatgtctgatgtggagccgctgg
	Z12-cR:cattccttacgagctctccg	Z12-cR-HA:GCTCCTCGCCCTTGCTCACCATcgagctctccggcctgaa
ZCN13	Z13-cF:atggccaacgattccttggt	Z13-cF-HA:ACTCTAGAGGATCCatggccaacgattccttggtcacagc
	Z13-cR:tcaagcaccaccacgtctgc	Z13-cR-HA:TCCTCGCCCTTGCTCACCATagcaccaccacgtctgccgc
ZCN14	Z14-cF:agctaggatcgaggaggagc	Z14-cF-HA:AGGTCGACTCTAGAGGATCCatgcagcgtggggatccgct
	Z14-cR:tcacattcttctcccaccg	Z14-cR-HA:TCCTCGCCCTTGCTCACCATcattcttctcccaccggttc
ZCN15	Z15-cF:gtcggatagatcgacatggc	Z15-cF-HA:GTCGACTCTAGAGGATCCatggccggcagggacagggagc
	Z15-cR:gatggagtgagtagtgtgcat	Z15-cR-HA:TCCTCGCCCTTGCTCACCATcgagtacatcctcctgcccc
ZCN16	Z16-cF:atgtcaagggacccacttgt	Z16-cF-HA:AGGTCGACTCTAGAGGATCCatgtcaagggacccacttgt
	Z16-cR:tcatctaatatatcgtctgccacc	Z16-cR-HA:TCCTCGCCCTTGCTCACCATtctaatatatcgtctgccac
ZCN17	Z17-cF:gatgttcaatatgtctagggaccc	Z17-cF-HA:AGGTCGACTCTAGAGGATCCgatgttcaatatgtctagggaccc
	Z17-cR:atatcaccttatgtaccttcttcc	Z17-cR-HA:TCCTCGCCCTTGCTCACCATatatcaccttatgtaccttcttcc
ZCN18	Z18-cF:ctatgtcacgaggcagggatc	Z18-cF-HA:AGGTCGACTCTAGAGGATCCatgtcacgaggcagggatcc
	Z18-cR:tcctaccttctgccaccaacac	Z18-cR-HA:TCCTCGCCCTTGCTCACCATccttctgccaccaacaccac
ZCN19	Z19-cF:atgtcaagggatccactagtg	Z19-cF-HA:AGGTCGACTCTAGAGGATCCatgtcaagggatccactagt
	Z19-cR:tgcggtgcagtcaatgagat	Z19-cR-HA:TCCTCGCCCTTGCTCACCATtctaatatatcgtctgcctc
ZCN20	Z20-cF:atgtccagggatccgcttgt	Z20-cF-HA:AGGTCGACTCTAGAGGATCCatgtccagggatccgcttgt
	Z20-cR:tcacctgtacctccgaccac	Z20-cR-HA:TCCTCGCCCTTGCTCACCATtcacctgtacctccgaccac
ZCN21	Z21-cF:atggcgccggcggctaacgat	Z21-cF-HA:AGGTCGACTCTAGAGGATCCatggcgccggcggctaacgat
	Z21-cR:tcagcccgcacgacggcggc	Z21-cR-HA:TCCTCGCCCTTGCTCACCATtcagcccgcacgacggcggc
ZCN24	Z24-cF:aactatgtcacgaggcaggga	Z24-cF-HA:AGGTCGACTCTAGAGGATCCaactatgtcacgaggcaggga
	Z24-cR:tctgttcttcagcttgatccc	Z24-cR-HA:TCCTCGCCCTTGCTCACCATtctgttcttcagcttgatccc
ZCN25	Z25-cF:atgtcaagggacccactagt	Z25-cF-HA:AGGTCGACTCTAGAGGATCCatgtcaagggacccactagt
	Z25-cR:cagtgcacagtcagtgaga	Z25-cR-HA:TCCTCGCCCTTGCTCACCATcagtgcacagtcagtgaga
ZCN26	Z26-cF:atggctaatgactccttgac	Z26-cF-HA:AGGTCGACTCTAGAGGATCCatggctaatgactccttgac
	Z26-cR:tcaagcttgccggccttcac	Z26-cR-HA:TCCTCGCCCTTGCTCACCATagcttgccggccttcacctt
ZCNPEBP	ZP-cF:gagacgagacgacgcatcat	ZP-cF-HA:AGGTCGACTCTAGAGGATCCatggcggcgcaggagggcgg
	ZP-cR:agtgtgtgtgttagttgttggc	ZP-cR-HA:TCCTCGCCCTTGCTCACCATgttgttggcgacgactccct
